# Supplementary material
Source: Springer Nature journal article supplement (https://www.springermedizin.de/resource/supplementary/12993_2009_261_MOESM4_ESM.pdf/9617412)

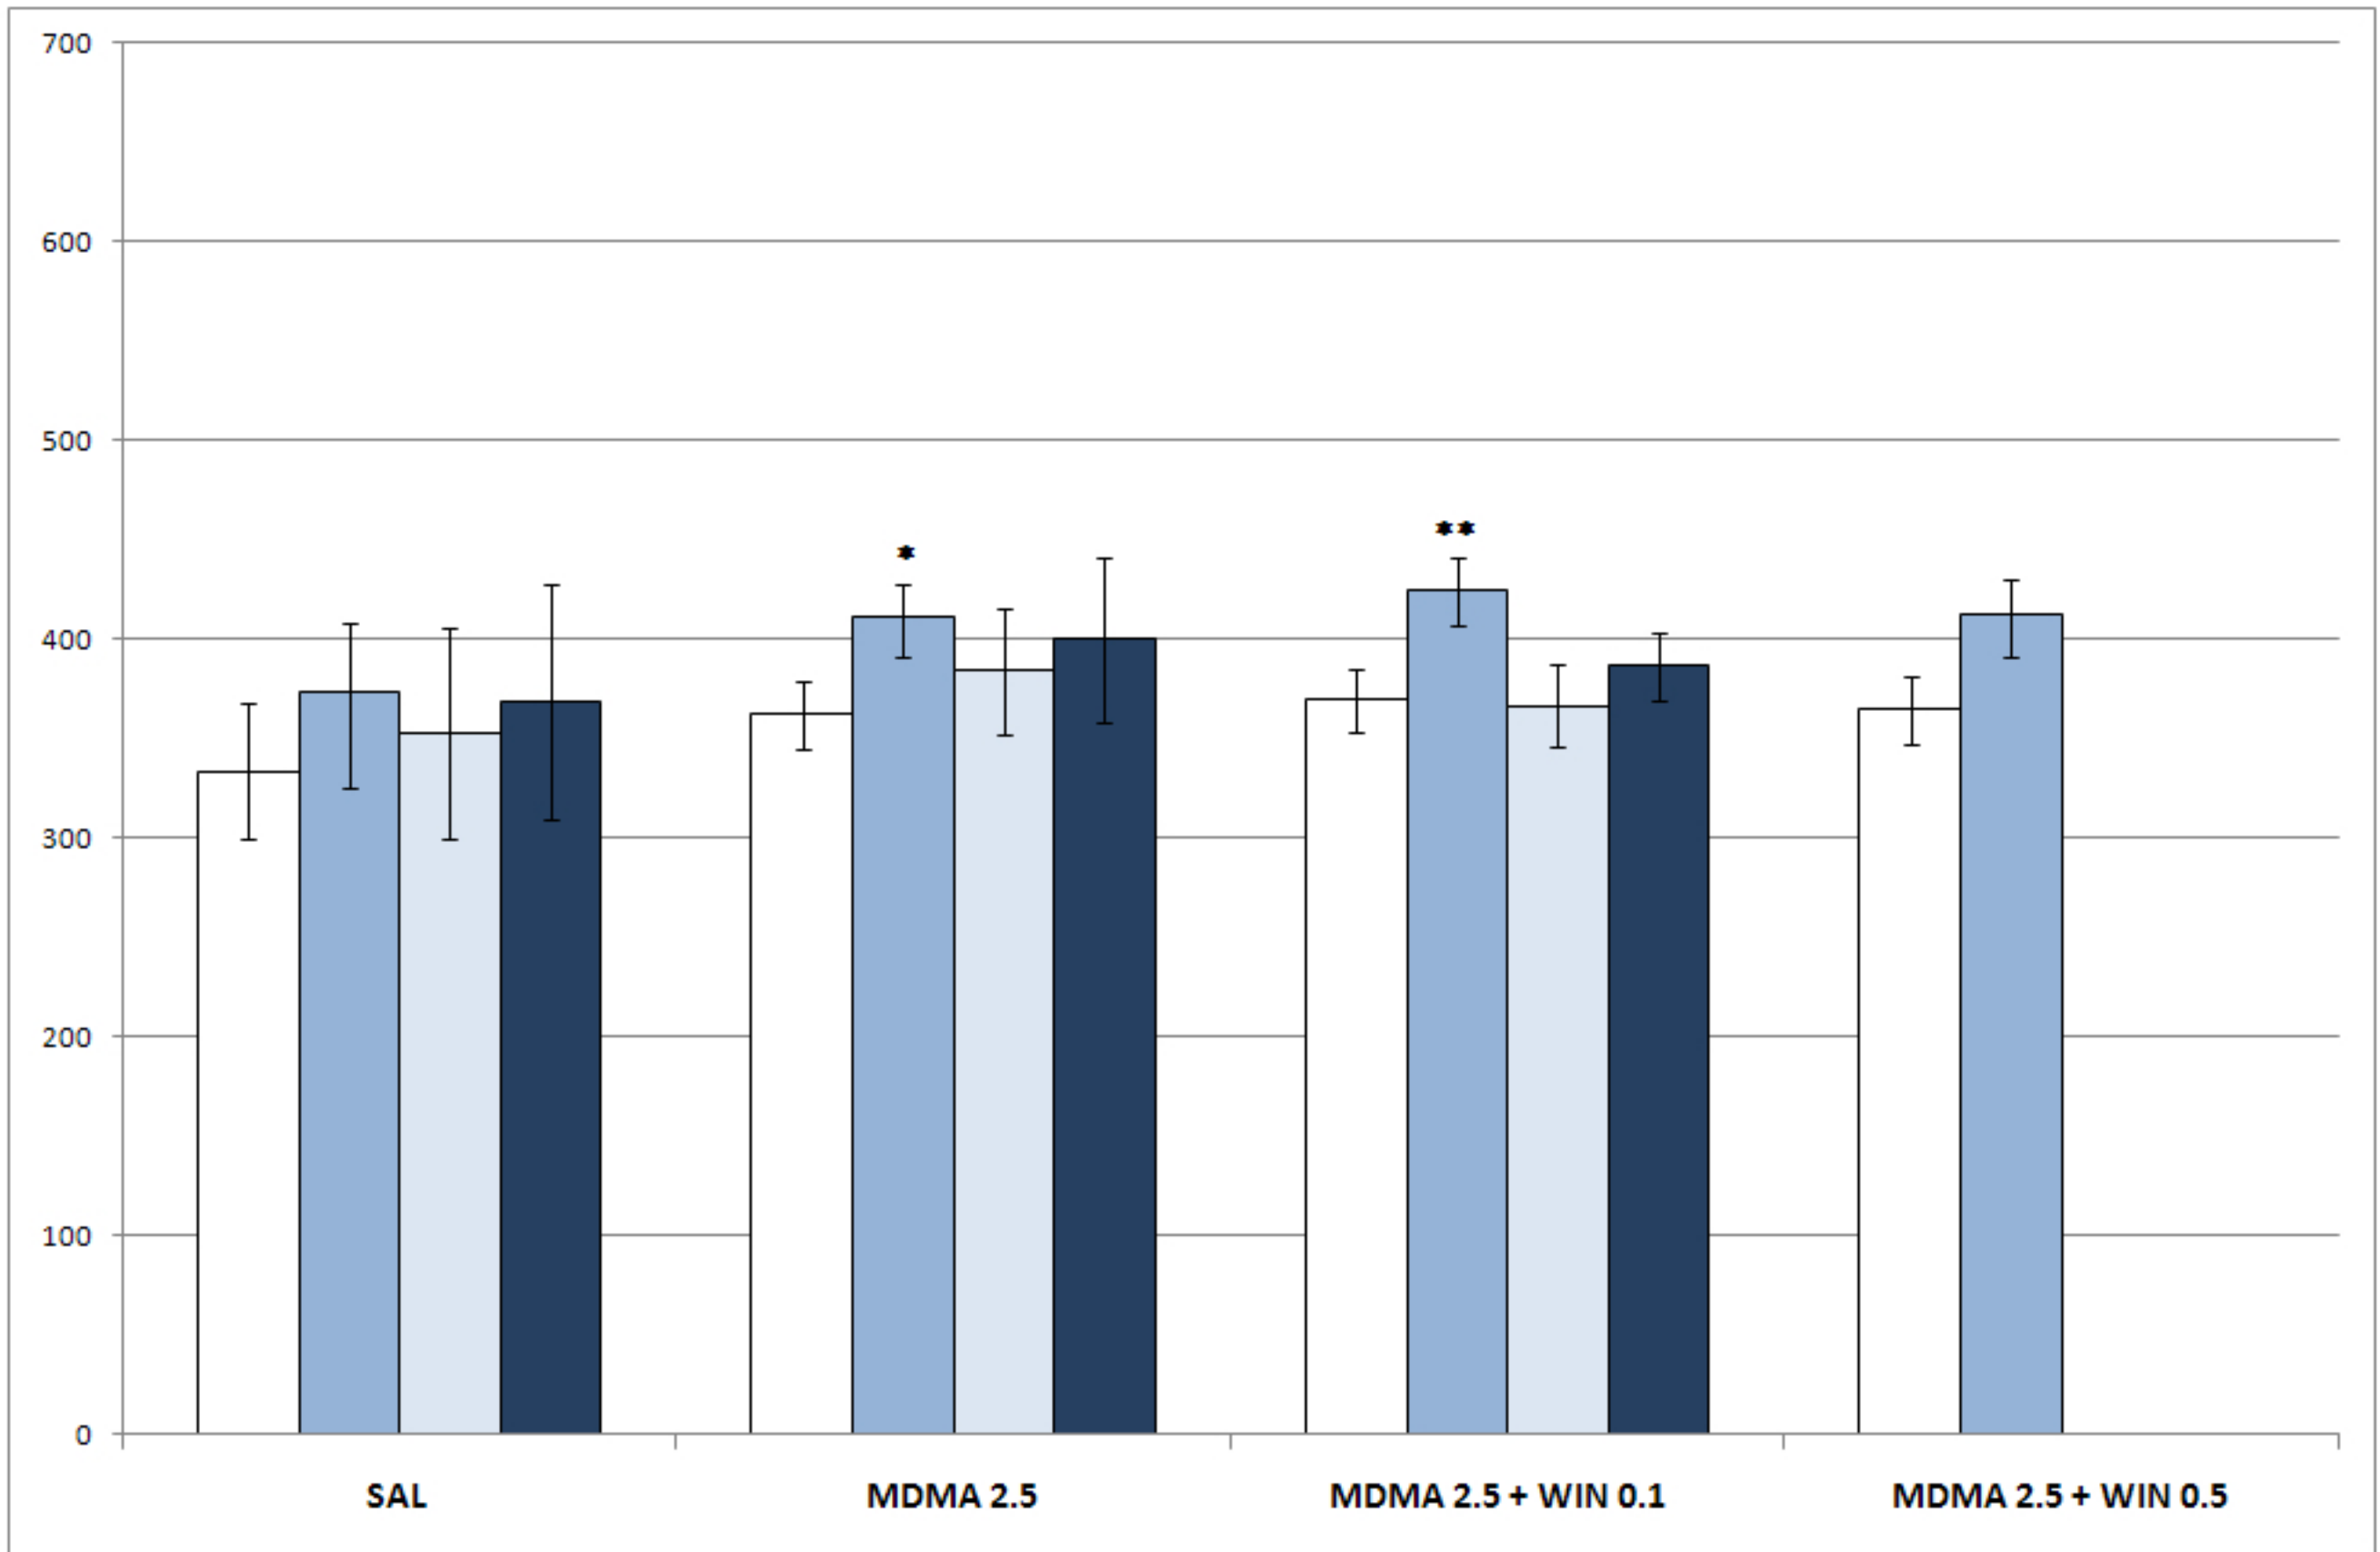

Supplement: MOESM4 [file 9617412]
